# Supplementary material
Source: publisher figshare collection journal article supplement (https://gsajournals.figshare.com/ndownloader/files/21912489)
Supplement: Supplementary file 1 [file 21912489]

**The utility of resolving asthma molecular signatures using tissue-specific transcriptome data**

Debajyoti Ghosh<sup>1</sup>, Lili Ding<sup>2</sup>, Jonathan B. Bernstein<sup>1</sup>, and Tesfaye B. Mersha<sup>3\*</sup>

<sup>1</sup>Immunology and Allergy, Department of Internal Medicine, University of Cincinnati, Cincinnati, OH, United States of America

<sup>2</sup>Division of Biostatistics and Epidemiology, Cincinnati Children's Hospital Medical Center, Department of Pediatrics, University of Cincinnati, Cincinnati, OH, United States of America

<sup>3</sup>Division of Asthma Research, Cincinnati Children's Hospital Medical Center, Department of Pediatrics, University of Cincinnati, Cincinnati, OH, United States of America

\*Corresponding author:

E-mail: [tesfaye.mersha@cchmc.org](mailto:tesfaye.mersha@cchmc.org)

Supporting Information

Figure S1

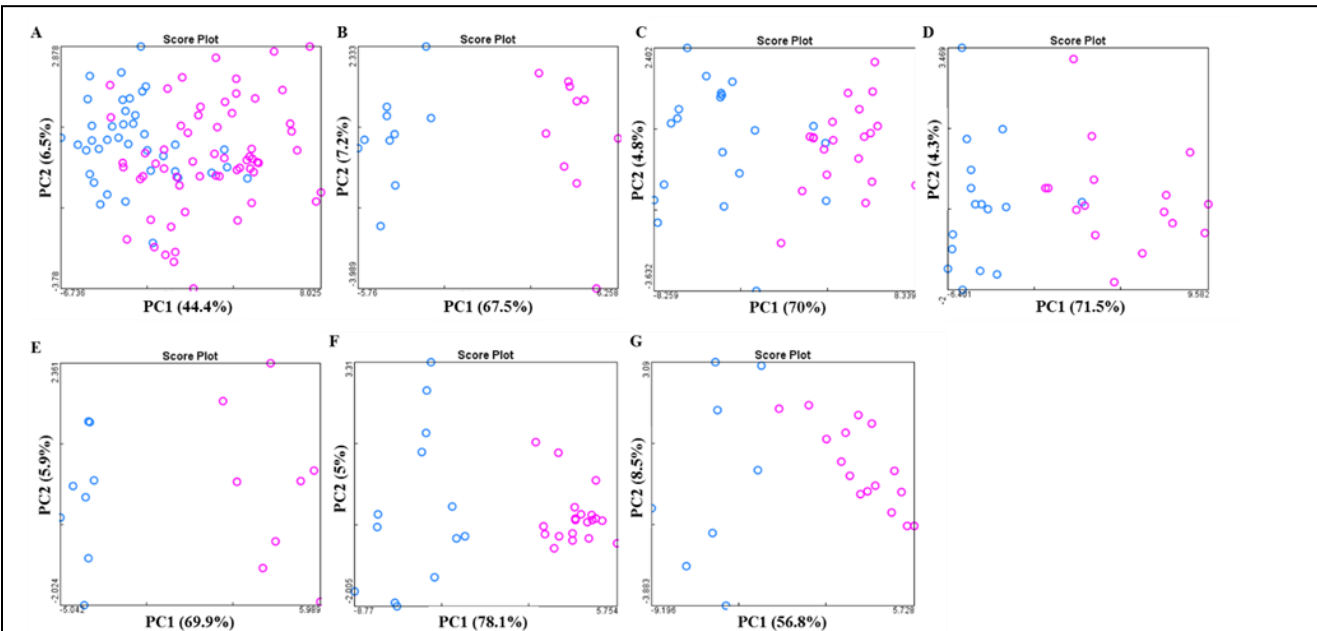

Figure S1. Tissue combined (A) and tissue-specific (B-G) DEGs-based principal component analysis (PCA). Tissue-resolved approach shows distinct separation of samples.

Figure S2

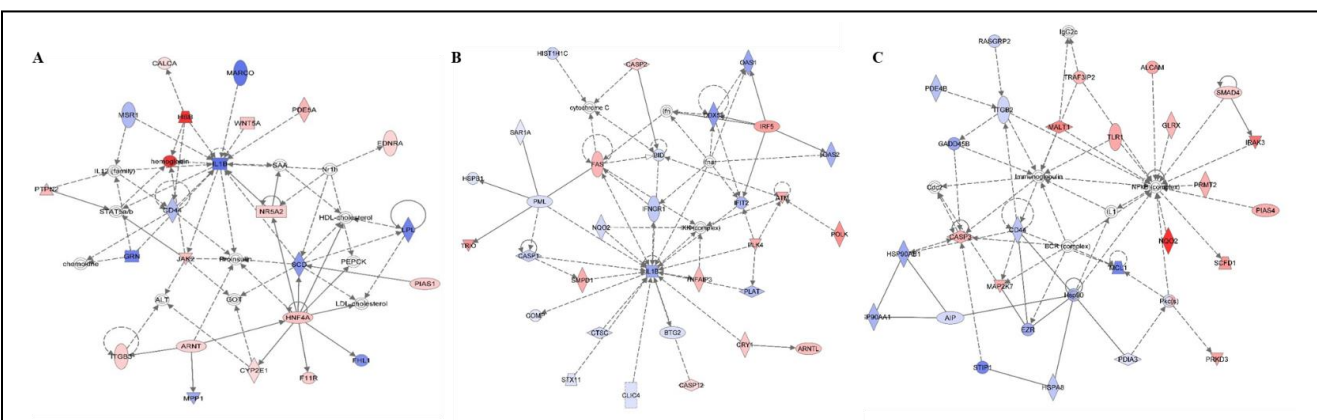

Figure S2. Tissue-specific gene networks in asthma: IL-12 and ERK are the major hub genes in Macrophages (A) indicating the role of sustained inflammation via the IL12 pathway and control of cell proliferation via ERK pathway in this cell type. The up-regulation of extracellular matrix-associated molecules and actin binding as well as cytoskeletal protein molecules have been previously reported in case of proximal (B) and distal (C) lung fibroblasts, respectively.

56 **Figure S3**

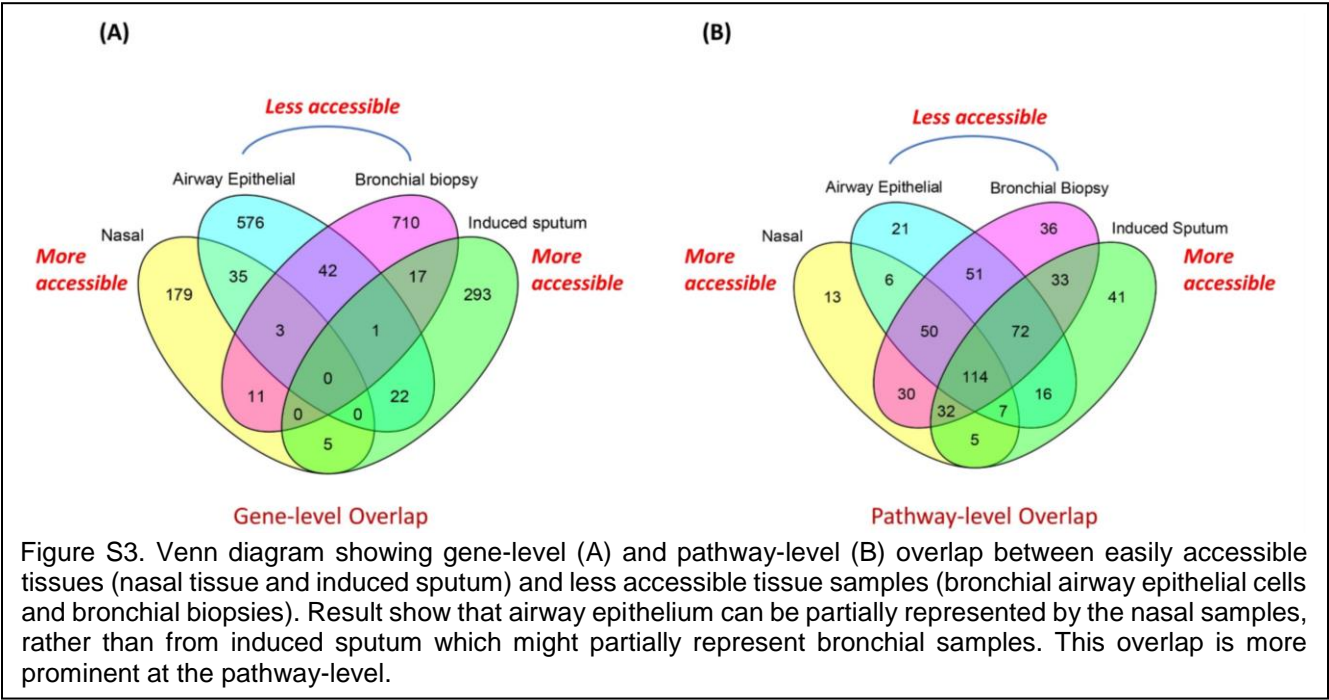

57  
58 **Figure S4**

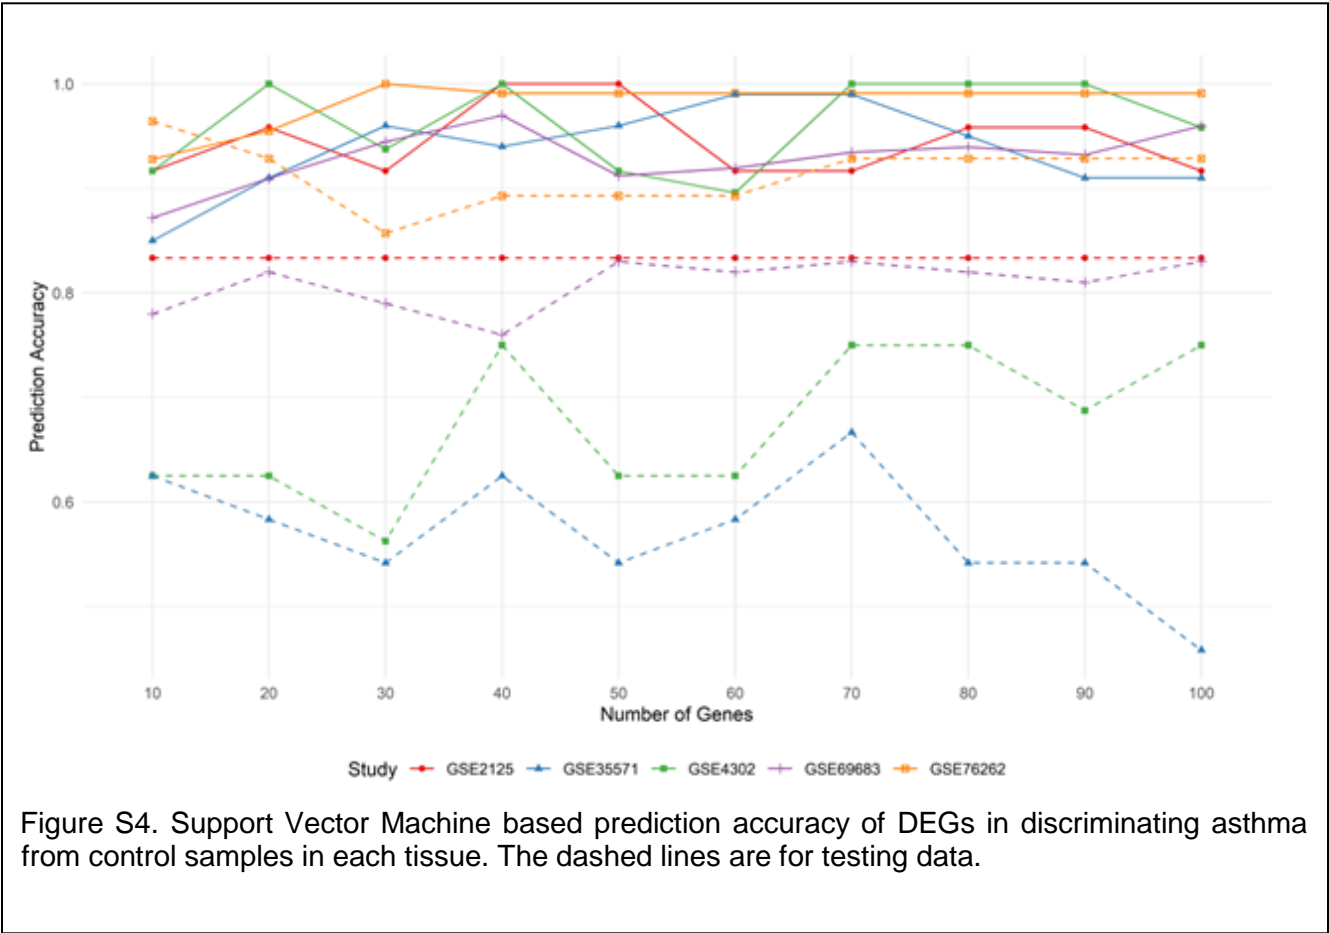

**Table S1.** Connectivity scores of perturbagens that connected with at least 3 different tissue/ samples types of asthmatics. Positive and negative scores are shown in red and blue background respectively.

| Perturbagens | FibroDistal | CD8    | Nasal  | Blood  | Bronchial | Sputum | AirEpi | CD4   | Macrophage | FibroProximal |
|--------------|-------------|--------|--------|--------|-----------|--------|--------|-------|------------|---------------|
| KLF6         | 96.61       | 96.58  | 99.58  | 41.78  | 0         | 0      | 96.94  | 0     | 99.16      | 0             |
| entinostat   | 98.77       | 86     | 88.91  | -89.98 | 1.48      | -93.42 | -0.63  | 8.04  | 98.97      | 43.02         |
| HOXB13       | 98.84       | 75.31  | 86.31  | 66.66  | 0         | 86.6   | 0      | 12.12 | 98.82      | 37.36         |
| BCL10        | 97.31       | 6.16   | 5.83   | 96.34  | 0         | 39.75  | 7.32   | 88.47 | 97.66      | 70.35         |
| IFNB1        | 98.52       | 86.38  | 77.85  | 93.62  | 5.79      | 94.33  | 80.89  | 51.65 | -45.14     | 80.06         |
| YWHAZ        | 0           | 2.53   | 93.94  | -42.28 | 92.14     | 41.38  | 96.69  | -29.4 | -84.74     | -93.49        |
| PPP2R3C      | 44          | -2.97  | 1.62   | 94.67  | 57.61     | 12.53  | 96.53  | 3.08  | 99.18      | 0             |
| DTX2         | -55.57      | 0      | 88.84  | -20.19 | 0         | 90.86  | 96.07  | 0     | -36.99     | 0             |
| LASP1        | 16.38       | 86.23  | 3.55   | -86.95 | 2.76      | -4.55  | 93.02  | -4.69 | 94.87      | 0             |
| XPO7         | -5.14       | 47.49  | 0      | -43.59 | 87.25     | 85.99  | 88.72  | 68.17 | -68.21     | 26.71         |
| LOXL1        | -84.63      | 0      | 71.07  | 94.6   | -68.73    | 95.36  | 86.11  | -5.16 | -60.55     | 0             |
| CDCA8        | 7.69        | -65.65 | 76.62  | 88.71  | 0         | 2.96   | 85.32  | 34.52 | 68.63      | 3.56          |
| PUF60        | 45.69       | 89.38  | 96.43  | -32.01 | 4.5       | -66.63 | -4.68  | 40.53 | 99.66      | 4.72          |
| TRIP10       | 22.61       | 35.18  | 5.72   | -62.88 | 87.4      | -26.13 | 0      | 0     | 99.4       | 0             |
| calyculin    | 99.61       | -53.54 | -96.17 | 98.38  | 0         | -95.02 | -98.66 | 10.68 | 98.13      | 2.64          |
| PREB         | 93.22       | 0      | -14.74 | 5.98   | 0         | 0      | 0      | 0     | 97.89      | 90.34         |
| BAMBI        | 18.34       | 0      | 0      | -34.17 | 0         | 93.66  | 0      | 17.65 | 97         | 0             |
| SORBS3       | 28.59       | 0      | 92.58  | -11.45 | 10.31     | -36.43 | 79.52  | 4.58  | 96.71      | 91.17         |
| importazole  | -29.71      | 97.49  | 93.9   | -71.03 | 0         | -99.65 | 11.65  | 30.11 | 90.3       | -0.63         |
| CCNL1        | 93.65       | 88.84  | 23.06  | 2.28   | 0         | -27.58 | -2.18  | 1.2   | 89.35      | 0             |
| DHX8         | -69.08      | 0      | 0      | 87.31  | 85.23     | 95.58  | 10.08  | 45.59 | -18.98     | 0             |
| KLF3         | 96.97       | 94.41  | 29.1   | 32.37  | 0         | -71.85 | 29.9   | 0     | 45.04      | 0             |
| BMS-345541   | 92.82       | 96.93  | 93.65  | -87.24 | 0         | -54.89 | 49.87  | 58.53 | -60.92     | 53.65         |
| ATOX1        | 86.39       | 0      | 1.99   | 2.18   | 0         | -10.93 | 20.12  | 86.52 | 27.22      | 0             |
| topotecan    | 19.32       | 98.48  | 97.96  | -29.64 | 0         | -86.33 | 32.73  | 90.06 | 57.41      | 0             |

**Table S2.** Description of connected perturbagens relevant for asthma. Type (based on biological / chemical function drug), location and entrez names of genetic perturbagens have been shown. Twenty-five perturbagens (listed in Table 3) associated with at least three different asthma-relevant tissue/sample types have been listed here.

| <b>Perturbagen</b> | <b>Type(s)</b>                          | <b>Location*</b>    | <b>Entrez Gene Name*</b>                               |
|--------------------|-----------------------------------------|---------------------|--------------------------------------------------------|
| ATOX1              | transporter                             | Cytoplasm           | A1256639 antioxidant 1 copper chaperone Atx1           |
| BAMBI              | TGF-beta pseudoreceptor                 | Plasma Membrane     | 2610003H06Rik BMP and activin membrane-bound inhibitor |
| BCL10              | transcription regulator                 | Cytoplasm           | BCL10 immune signaling adaptor                         |
| BMS-345541         | chemical drug (IKK-2 inhibitor)         | Other               |                                                        |
| calyculin A        | chemical toxicant                       | Other               |                                                        |
| CCNL1              | other                                   | Nucleus             | cyclin L1                                              |
| CDCA8              | other                                   | Nucleus             | cell division cycle associated 8                       |
| DHX8               | enzyme                                  | Nucleus             | DEAH-box helicase 8                                    |
| DTX2               | other                                   | Nucleus             | deltex E3 ubiquitin ligase 2                           |
| entinostat         | chemical drug                           | Other               |                                                        |
| HOXB13             | transcription regulator                 | Nucleus             | homeobox B13                                           |
| IFNB1              | cytokine                                | Extracellular Space | interferon beta 1                                      |
| Importazole        | chemical drug (Inhibitor of importin-β) | Other               |                                                        |
| KLF3               | transcription regulator                 | Nucleus             | Kruppel like factor 3                                  |
| KLF6               | transcription regulator                 | Nucleus             | Kruppel like factor 6                                  |
| LASP1              | cytoskeletal activities                 | Cytoplasm           | LIM and SH3 protein 1                                  |
| LOXL1              | enzyme                                  | Extracellular Space | lysyl oxidase like 1                                   |
| PPP2R3C            | other                                   | Cytoplasm           | protein phosphatase 2 regulatory subunit B"gamma       |
| PREB               | transcription regulator                 | Nucleus             | prolactin regulatory element binding                   |
| PUF60              | other                                   | Nucleus             | poly(U) binding splicing factor 60                     |
| SORBS3             | other                                   | Cytoplasm           | sorbin and SH3 domain containing 3                     |
| topotecan          | biologic drug (topoisomerase inhibitor) | Other               |                                                        |
| TRIP10             | other                                   | Cytoplasm           | thyroid hormone receptor interactor 10                 |
| XPO7               | transporter                             | Nucleus             | exportin 7                                             |
| YWHAZ              | enzyme                                  | Cytoplasm           | tryptophan 5-monooxygenase activation protein zeta     |

\*For genetic perturbagens
